# Supplementary material for: Clinical Efficacy of Immune Checkpoint Inhibitors in Non–Small Cell Lung Cancer Patients with Liver Metastases: A Network Meta-Analysis of Nine Randomized Controlled Trials
Source: PubMed Central journal article supplement — Cancer Res Treat. 2021 Oct 25;54(3):803–16. doi: 10.4143/crt.2021.764 (PMC9296924; doi:10.4143/crt.2021.764), 2021-10-25
Supplement: crt-2021-764_S2_Fig.pdf [file crt-2021-764_S2_Fig.pdf]

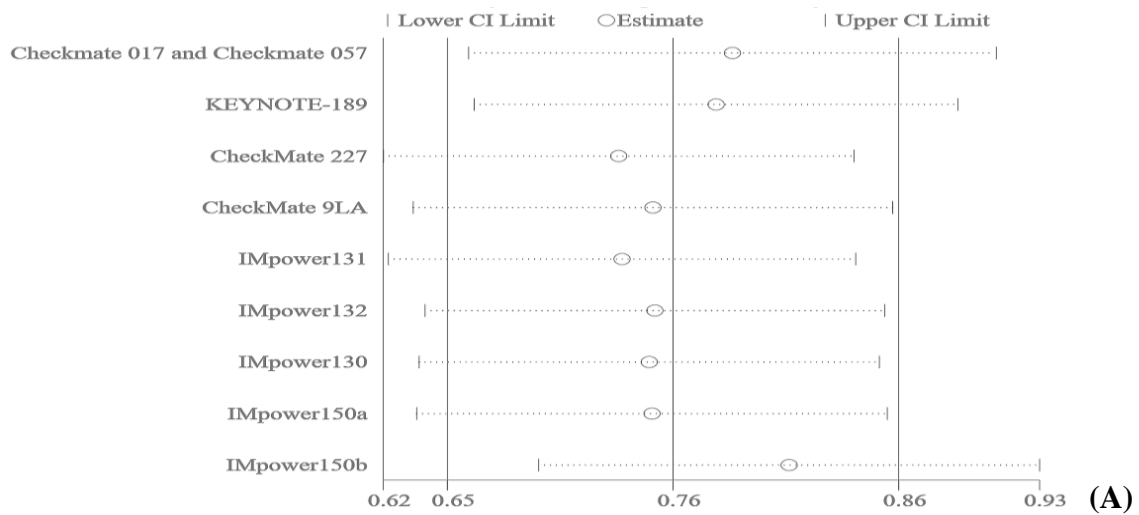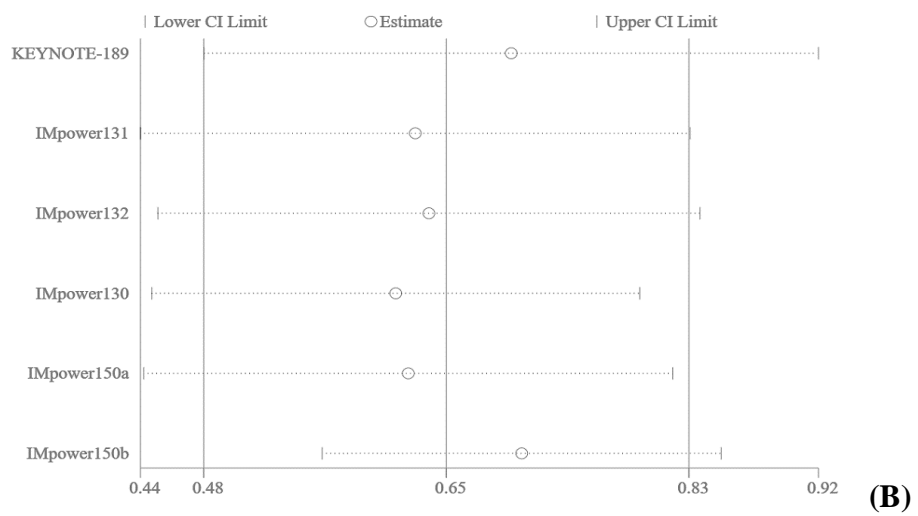

**S2 Fig.** Forest plot of leave-one-out approach on OS-HR (A) and PFS-HR (B). HR, hazard ratio; OS, overall survival; PFS, progress-free survival.
